# Supplementary material for: Cohort study of the characteristics and outcomes in patients with COVID-19 and in-hospital cardiac arrest
Source: HighWire-hosted journal article supplement (doi:10.1136/bmjopen-2021-054943), 2021-11-01
Supplement: bmjopen-2021-054943supp001_data_supplement.pdf [file bmjopen-2021-054943supp001_data_supplement.pdf]

**Supplementary figures and tables**

**Characteristics and Outcomes in Patients with COVID-19 and In-Hospital Cardiac Arrest**

### Supplementary Table 1: Characteristics of COVID+ patients with IHCA in relation to sex.

**Supplementary Table 1:** Characteristics of 181 COVID+ patients with IHCA during the COVID-19 pandemic in relation to sex. One COVID+ patient had missing data on sex.

| variables                                  | Men               | Women             | SMD   |
|--------------------------------------------|-------------------|-------------------|-------|
| <b>n</b>                                   | 113               | 68                |       |
| <b>Demographics:</b>                       |                   |                   |       |
| Age - mean (SD)                            | 71.39 (10.75)     | 70.35 (14.87)     | 0.080 |
| <b>Location of cardiac arrest - n (%):</b> |                   |                   | 0.249 |
| Coronary care unit                         | 7 ( 6.2)          | 7 ( 10.3)         |       |
| Intensive care unit                        | 15 (13.3)         | 10 ( 14.7)        |       |
| Operational room                           | 0 ( 0.0)          | 0 ( 0.0)          |       |
| Emergency room                             | 17 (15.0)         | 11 ( 16.2)        |       |
| Outpatient lab, radiology                  | 4 ( 3.5)          | 3 ( 4.4)          |       |
| Cathlab                                    | 6 ( 5.3)          | 2 ( 2.9)          |       |
| Intermediate care unit                     | 11 ( 9.7)         | 4 ( 5.9)          |       |
| Regular ward                               | 52 (46.0)         | 30 ( 44.1)        |       |
| Other                                      | 1 ( 0.9)          | 1 ( 1.5)          |       |
| <b>Critical times - median (IQR):</b>      |                   |                   |       |
| Time to alert – median (IQR)               | 1.00 [1.00, 1.00] | 1.00 [1.00, 1.00] | 0.256 |
| Time to CPR - median (IQR)                 | 0.00 [0.00, 0.00] | 0.00 [0.00, 1.00] | 0.031 |
| Time to defibrillation - median            | 2.00 [1.00, 5.00] | 2.00 [1.00, 2.00] | 0.009 |
| <b>Comorbidities - n (%):</b>              |                   |                   |       |
| MI, ongoing - n (%)                        | 5 ( 7.6)          | 7 ( 21.2)         | 0.396 |
| MI, previous - n (%)                       | 11 (16.4)         | 2 ( 4.7)          | 0.391 |
| Stroke, ongoing - n (%)                    | 4 ( 5.8)          | 0 ( 0.0)          | 0.351 |
| Stroke, previous - n (%)                   | 5 ( 7.0)          | 2 ( 4.7)          | 0.102 |
| Cancer, any - n (%)                        | 13 (18.8)         | 6 ( 14.0)         | 0.132 |
| Diabetes - n (%)                           | 24 (33.3)         | 12 ( 27.9)        | 0.118 |
| Heart failure - n (%)                      | 23 (33.8)         | 13 ( 32.5)        | 0.028 |
| Ejection fraction (%) - mean (SD)          | 44.84 (12.22)     | 49.31 (10.56)     | 0.392 |
| EF <50% - n (%)                            | 19 (51.4)         | 7 ( 43.8)         | 0.153 |
| <b>Kidney function category - n (%):</b>   |                   |                   | 0.357 |
| eGFR <30                                   | 16 (22.9)         | 6 ( 15.0)         |       |
| eGFR 30–59                                 | 17 (24.3)         | 15 ( 37.5)        |       |
| eGFR 60–89                                 | 18 (25.7)         | 7 ( 17.5)         |       |
| eGFR ≥90                                   | 19 (27.1)         | 12 ( 30.0)        |       |
| No kidney failure (eGFR ≥60)               | 37 (52.9)         | 19 ( 47.5)        | 0.107 |
| eGFR (ml/min/m <sup>2</sup> ) - mean (SD)  | 72.72 (65.75)     | 68.70 (45.34)     | 0.071 |
| <b>Cause of arrest - n (%):</b>            |                   |                   | 0.920 |
| Hemorrhage                                 | 1 ( 1.5)          | 1 ( 2.9)          |       |
| Myocardial infarction/ischemia             | 7 (10.6)          | 8 ( 23.5)         |       |
| Other                                      | 18 (27.3)         | 12 ( 35.3)        |       |
| Primary arrhythmia                         | 3 ( 4.5)          | 5 ( 14.7)         |       |
| Respiratory insufficiency                  | 17 (25.8)         | 7 ( 20.6)         |       |

|                                          |           |            |       |
|------------------------------------------|-----------|------------|-------|
| Sepsis / infection                       | 18 (27.3) | 1 ( 2.9)   |       |
| Stroke / thromboembolism                 | 2 ( 3.0)  | 0 ( 0.0)   |       |
| <b>Early interventions - n (%):</b>      |           |            |       |
| Witnessed arrest - n (%)                 | 86 (76.8) | 53 ( 79.1) | 0.056 |
| ECG monitoring - n (%)                   | 56 (50.5) | 33 ( 50.0) | 0.009 |
| CPR before AGA - n (%)                   | 90 (92.8) | 55 ( 94.8) | 0.085 |
| Defibrillated before AGA - n (%)         | 13 (13.8) | 5 ( 8.9)   | 0.155 |
| Ventilated before AGA- n (%)             | 49 (56.3) | 25 ( 53.2) | 0.063 |
| Shockable rhythm - n (%)                 | 22 (20.8) | 7 ( 11.5)  | 0.254 |
| Defibrillated, any - n (%)               | 29 (26.4) | 11 ( 16.9) | 0.231 |
| Intubated - n (%)                        | 61 (57.0) | 38 ( 58.5) | 0.029 |
| Adrenaline given - n (%)                 | 76 (70.4) | 48 ( 76.2) | 0.132 |
| Antiarrhythmics - n (%)                  | 11 (10.4) | 6 ( 9.7)   | 0.023 |
| Mechanical compressions - n (%)          | 12 (10.9) | 5 ( 8.1)   | 0.097 |
| Active temperature control - n (%)       | 2 (6.1)   | 3 ( 20.0)  | 0.423 |
| <b>Status at rescue team arrival - n</b> |           |            |       |
| Consciousness - n (%)                    | 11 (11.3) | 6 (10.7)   | 0.020 |
| Breathing - n (%)                        | 18 (18.6) | 11 (19.6)  | 0.028 |
| Pulse - n (%)                            | 22 (22.7) | 13 (23.2)  | 0.013 |
| <b>Follow-Up data - n (%):</b>           |           |            |       |
| Angiography - n (%)                      | 4 (12.1)  | 4 (26.7)   | 0.374 |
| PCI - n (%)                              | 2 (6.1)   | 2 (13.3)   | 0.248 |
| Pacemaker implanted - n (%)              | 0 (0.0)   | 2 (13.3)   | 0.555 |
| ICD implanted - n (%)                    | 0 (0.0)   | 1 ( 6.7)   | 0.378 |
| ROSC - n (%)                             | 40 (35.4) | 24 (35.3)  | 0.002 |
| Death at 30 days - n (%)                 | 85 (75.2) | 56 (82.4)  | 0.175 |
| Death overall - n (%)                    | 85 (75.2) | 56 (82.4)  | 0.175 |
| Discharged alive - n (%)                 | 16 (22.2) | 6 (14.0)   | 0.216 |

**SD = standard deviation; IQR = interquartile range; SMD = standardized mean difference (difference between the means for the two groups divided by their mutual standard deviation. Values below 0.1 (10%) are considered inconsequential (i.e., no significant difference between the groups)). CPR = cardiopulmonary resuscitation, PCI = percutaneous coronary intervention, ICD = implantable cardioverter-defibrillator. ROSC = return of spontaneous circulation. AGA= alarm group arrival.**

## Supplementary Figure 1: Missing data before and after imputation with MICE

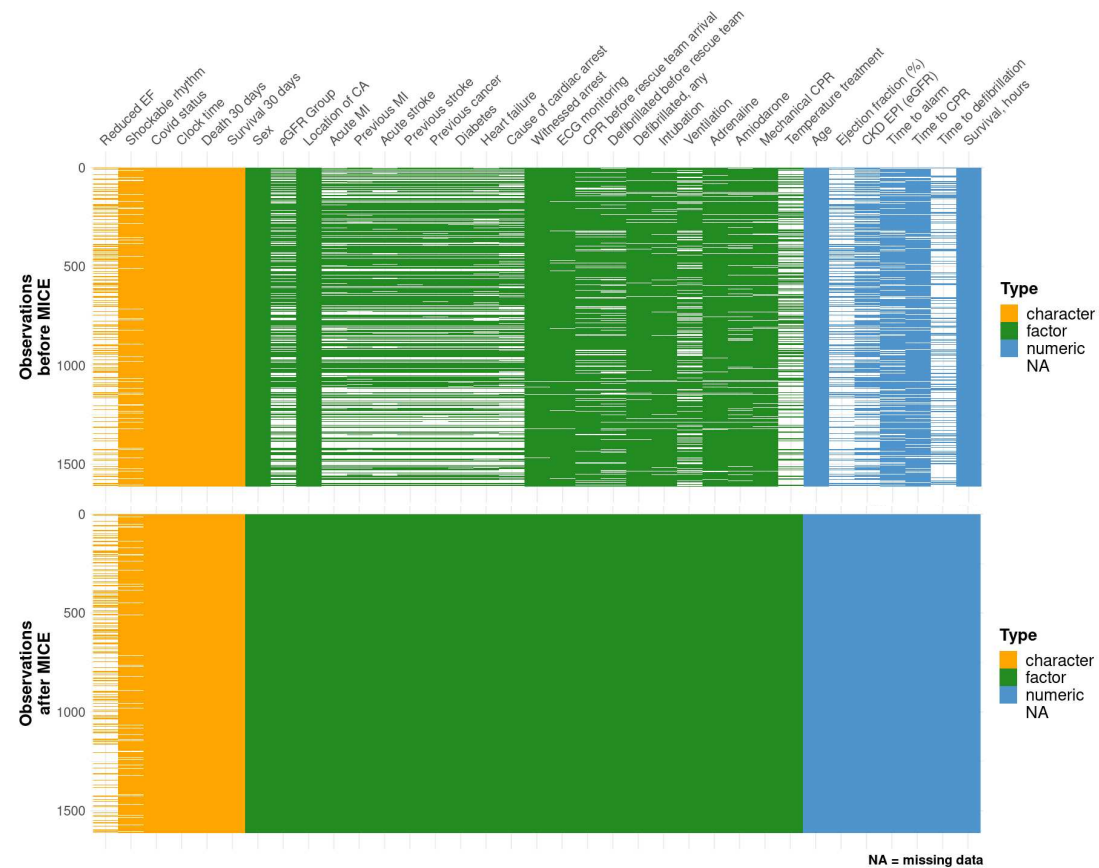

**Supplementary Figure 1: Missing data before and after imputation with MICE.** A graphical view of the entire dataset is printed. Each column (variable) is depicted at the top and column color depicts type of variable. Each patient represents a row and white gaps indicate a missing data entry.

Supplementary Figure 2: Flow chart

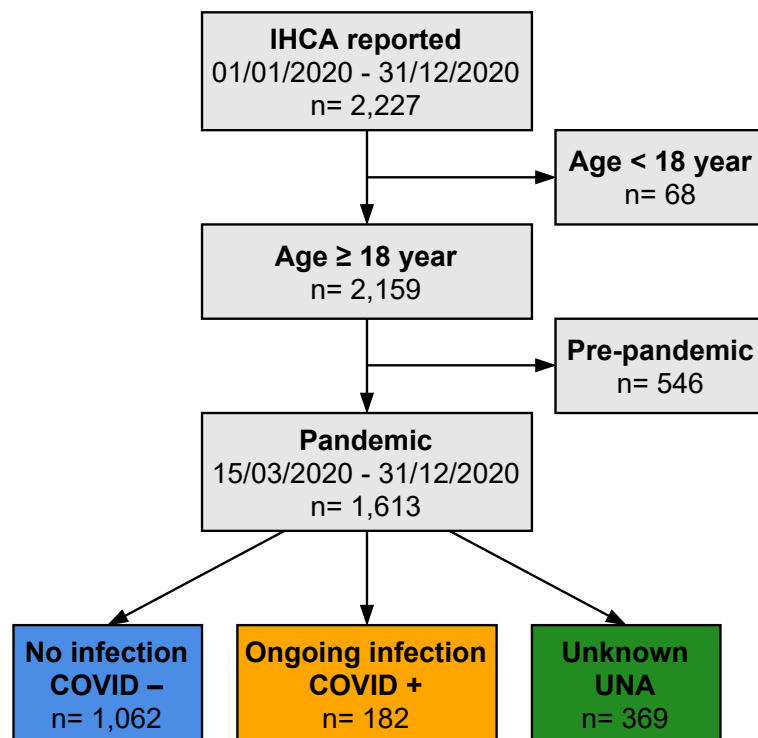

**Supplementary Figure 2: Flow chart of the study population.** Patients who were less than 18 year of age, and cases occurring in the pre-pandemic period were excluded.

Supplementary Figure 3: Information on COVID-19 status during the study period.

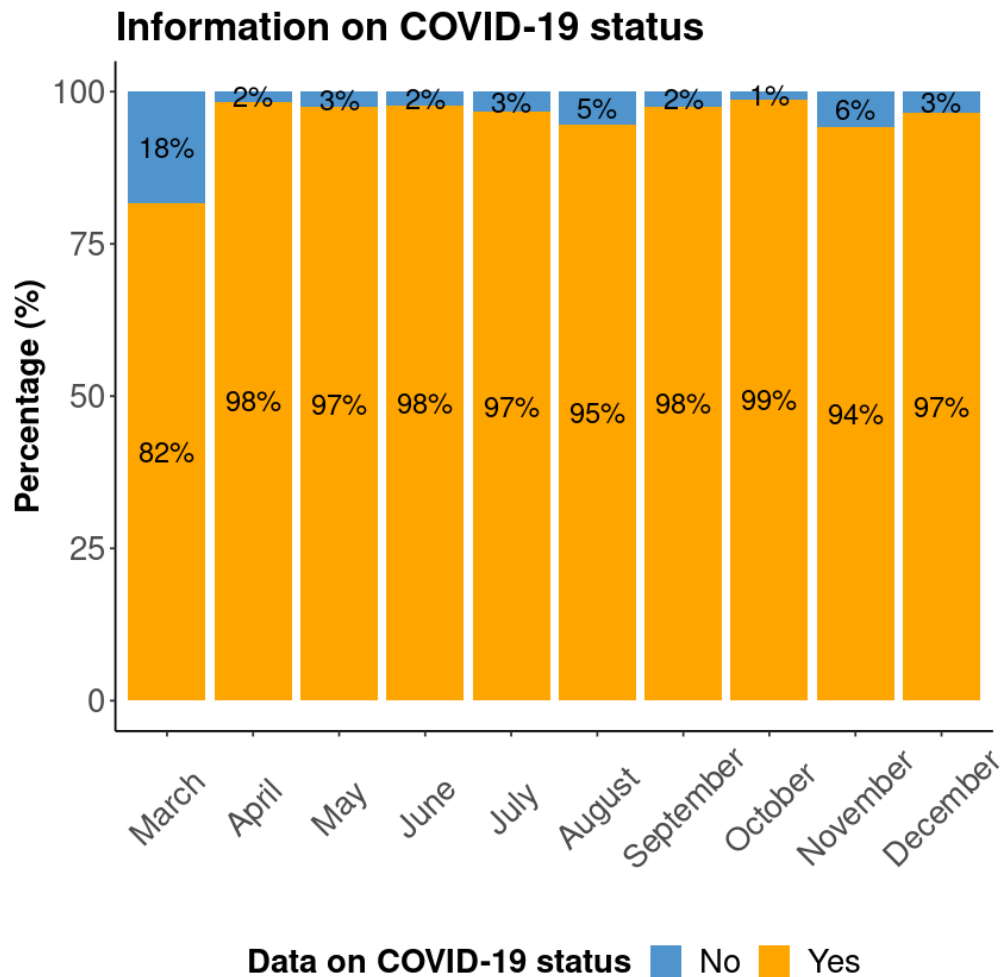

**Supplementary Figure 3: Information on COVID-19 status during the study period.** No equals missing data, i.e. no information on COVID-19 status available. Yes equals, COVID +, COVID – or Unknown. In March only cases after 15/03/2020 were included.

Supplementary Figure 4: Distribution of age

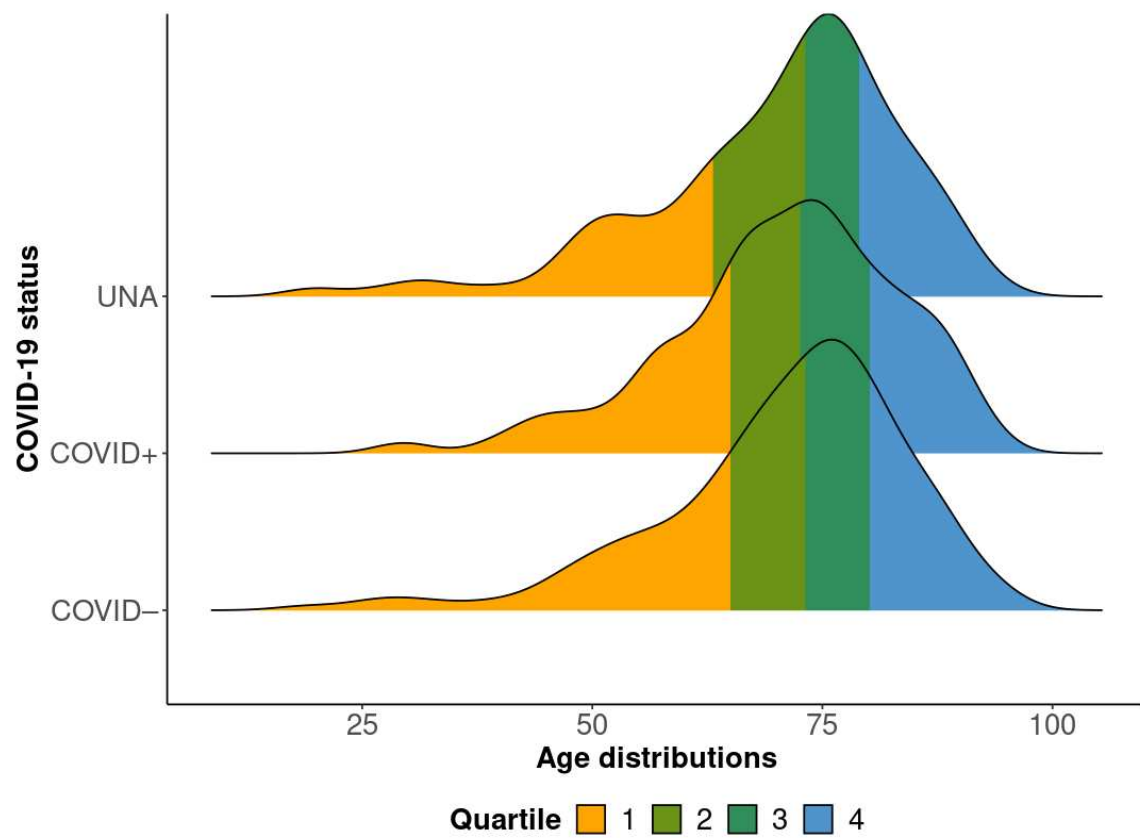

Supplementary Figure 4: Distribution of age in relation to COVID-19 status.

Supplementary Figure 5: Etiology of IHCA, according to sex

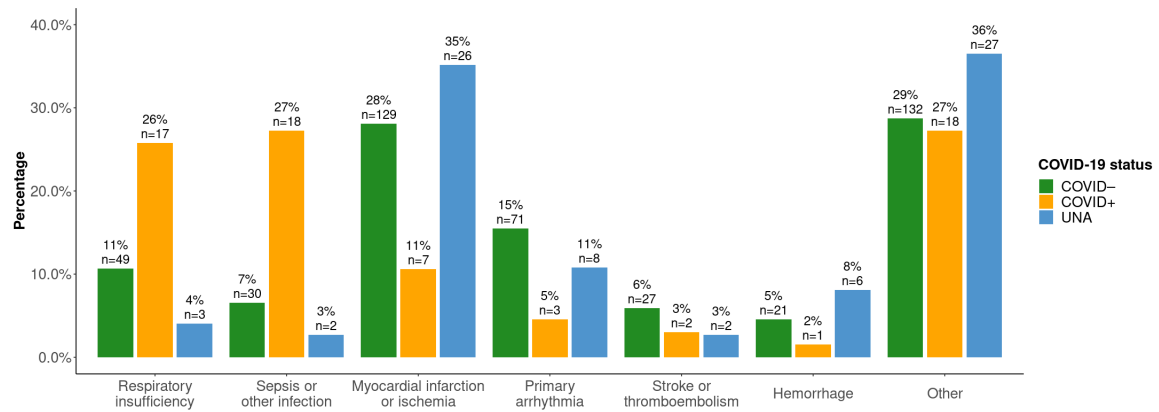

Supplementary Figure 5A: Etiology of IHCA, men only.

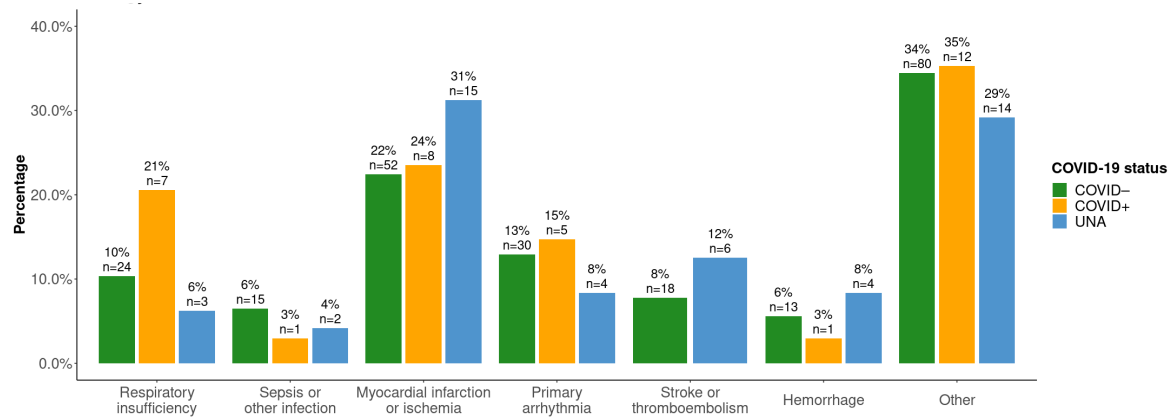

Supplementary Figure 5B: Etiology of IHCA, women only.



Supplementary Figure 6: Conditions preceding IHCA, according to sex

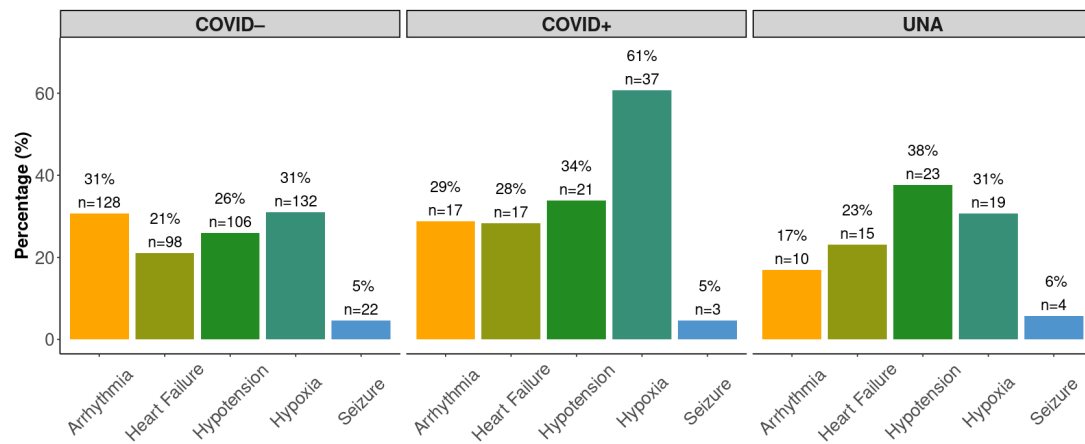

Supplementary Figure 6A: Conditions preceding IHCA, men only.

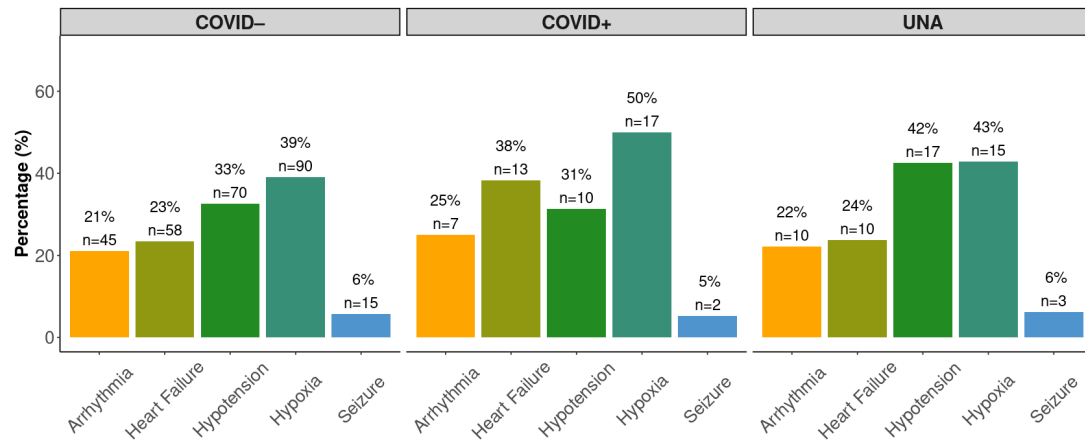

Supplementary Figure 6B: Conditions preceding IHCA, women only.

Supplementary Figure 7: Cox adjusted survival curve for the overall population

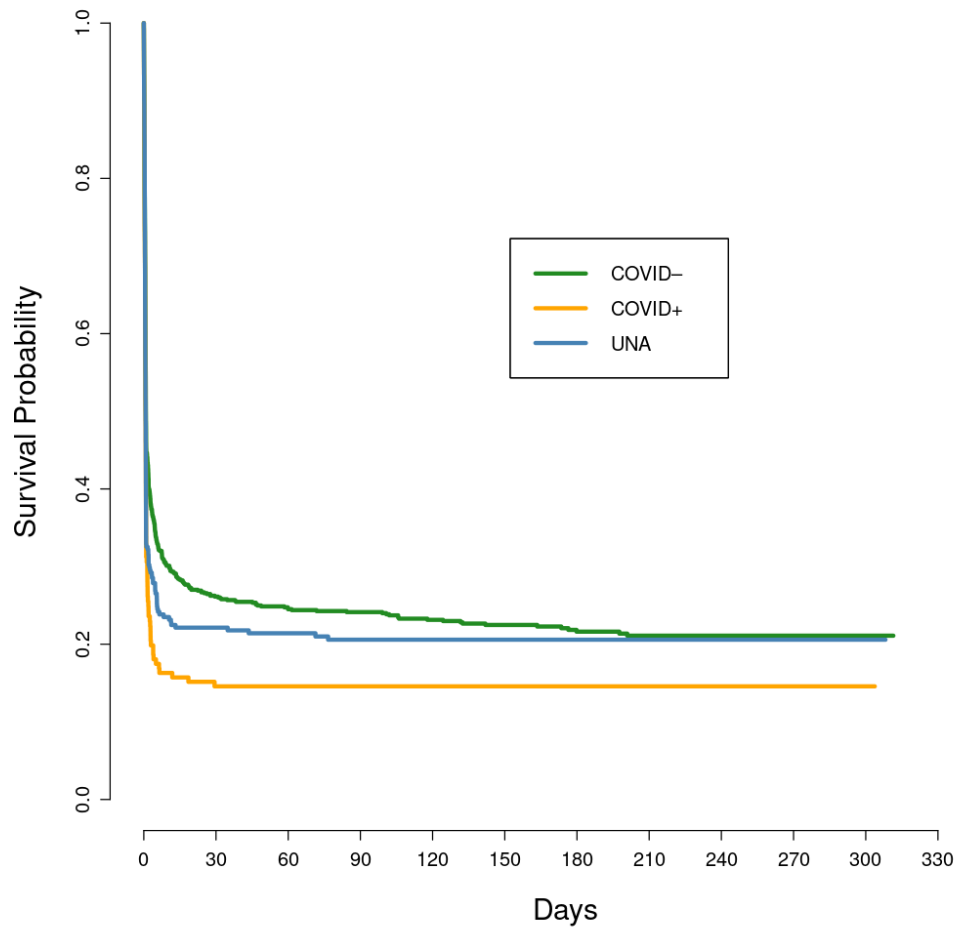**Supplementary Figure 7: Cox adjusted survival curve for the overall population, stratified on COVID-19 status.**
